# Supplementary material for: Antibacterial Zirconia Surfaces from Organocatalyzed Atom-Transfer Radical Polymerization
Source: MDPI journal article supplement (doi:10.3390/ma17081775), 2024-04-12
Supplement: s1 [file s1]

# Antibacterial Zirconia Surfaces from Organocatalyzed Atom-Transfer Radical Polymerization

Nesrine Harfouche <sup>1</sup>, Philippe Marie <sup>2</sup>, Diana Dragoie <sup>3</sup>, Hung Le <sup>4</sup>, Pascal Thébault <sup>4</sup>, Christelle Bilot <sup>5</sup>, Arnaud Fouchet <sup>5</sup>, Jacques Rouden <sup>1</sup>, Jérôme Baudoux <sup>1</sup> and Bénédicte Lepoittevin <sup>1,\*</sup>

<sup>1</sup> LCMT, UMR 6507, ENSICAEN, UNICAEN, CNRS, Normandie Université, 14000 Caen, France; nesrine.harfouche@ensicaen.fr (N.H.); jacques.rouden@ensicaen.fr (J.R.); jerome.baudoux@ensicaen.fr (J.B.)

<sup>2</sup> CIMAP, UMR 6252, ENSICAEN, UNICAEN, CNRS, Normandie Université, 14000 Caen, France; philippe.marie@ensicaen.fr

<sup>3</sup> ICMMO, UMR 8182, CNRS, Université Paris-Saclay, 91405 Orsay, France; diana.dragoe@universite-paris-saclay.fr

<sup>4</sup> INSA Rouen Normandie, PBS UMR 6270, CNRS, Normandie Université, Université de Rouen Normandie, 76000 Rouen, France; hung.le@univ-rouen.fr (H.L.); pascal.thebault@univ-rouen.fr (P.T.)

<sup>5</sup> CRISMAT, ENSICAEN, UNICAEN, CNRS, Normandie Université, 14000 Caen, France; christelle.bilot@ensicaen.fr (C.B.); arnaud.fouchet@ensicaen.fr (A.F.)

\* Correspondence: benedicte.lepoittevin@ensicaen.fr

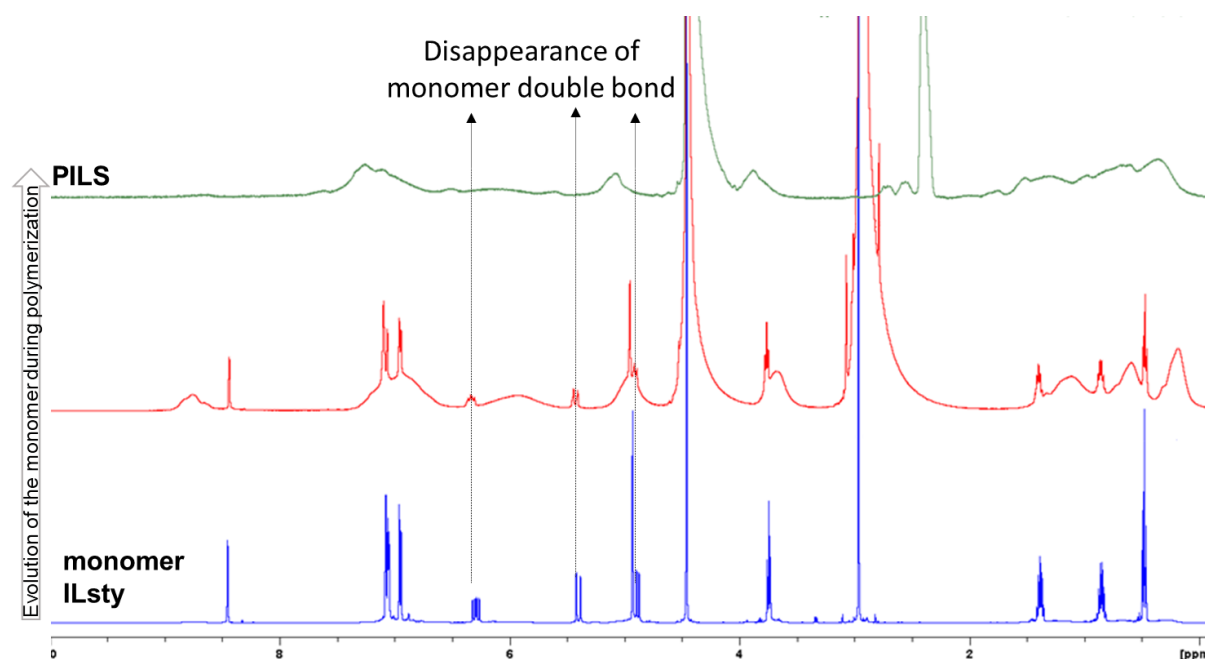

**Figure S1.** Evolution of <sup>1</sup>H NMR spectra (Bruker Avance III 500 MHz) during polymerization. Samples were dissolved in D<sub>2</sub>O.
